# Supplementary material for: Colloidal crystalline polymer generated in situ from growing star poly(oxazolines)Electronic supplementary information (ESI) available: further experimental evidence for the results presented in this communication. See http://www.rsc.org/suppdata/jm/b2/b211674j/
Source: Royal Society of Chemistry journal article supplement (doi:10.1039/b211674j), 2003-02-13
Supplement: b211674j.doc [file b211674j.doc]

Supplementary Material (ESI) *for J. Mater. Chem*.

This journal is © The Royal Society of Chemistry

**Fig. 1S**. 1H NMR spectra for SPMOX-6. Top: Reaction mixture (in CDCl3) after polymerized at 100oC for 22 h. There was no signals due to residue of 2-methyl-2-oxazoline (MOX) indicating MO converted completely into the corresponding SPMOX-6. Bottom: Micron powders of SPMOX-6 in D2O.

**Fig. 2S**. Solid state 13C NMR spectra for different solid states of SPMO-6. Top: Micron powders obtained from milky suspension with washing by ethyl acetate. Bottom: Water-treated micron powders. The micron powders were dissolved in water and the aqueous solution was added into excess of acetone resulting in the precipitates.

**Fig. 3S**. 1H NMR spectra for time-course polymerization of MOX. The signals at 3.78 and 4.26 ppm due to NCH2CH2 O in MOX were reduced with time. As replacing, new peak at 3.71 ppm attributed to (CH2NCH2) unit appeared and increased. Conversion of MOX was estimated from the integration ratios between signals at 4.26 and 3.71 ppm.

**Fig. 4S.** Pictures of state for block copolymerization and GPC traces.

1. Fluid milky state of the reaction mixture containing SPMOX-6 and 2-ethyl-2-oxazoline (EOX) in DMA at 100oC. SPMOX-6 was obtained by polymerization of MOX with HKBB initiator in DMA at 100oC for 24 h. After MOX converted completely the reaction mixture was left at room temperature for 2 days. Then, EOX was added and heated to 100oC.
2. The milky state reaction mixture containing S(PMOX-b-PEOX)-6 in DMA at 100oC. The reaction mixture was produced from block copolymerization at 100oC for 24 h. Fluidity of the mixture decreased apparently.
3. The state of the reaction mixture S(PMOX-b-PEOX)-6 in DMA at room temperature. There is no fluidity.
4. GPC traces for SPMOX-6 (dashed line) and S(PMOX-b-PEOX)-6 (solid line).

**Fig. 5S**. 1H NMR profiles for block copolymerization. Top (in CDCl3): MOX before polymerization. Middle (in CDCl3): SPMOX-6 after MOX polymerized at 100oC for 24 h (in CDCl3). Bottom (in D2O): S(PMOX-b-PEOX) after SPMO-6 initiated the block polymerization of EOX at 100oC for 24 h.
